# Supplementary material for: Evidence that TSC2 acts as a transcription factor and binds to and represses the promoter of Epiregulin
Source: PubMed Central journal article supplement (PMC4041451; doi:10.1093/nar/gku278), 2014-04-19
Supplement: supp_gku278_nar-03278-v-2013-File014.pdf [file supp_gku278_nar-03278-v-2013-File014.pdf]

**Supplementary Table S1.** PCR primers used for the validation of stable clones and microarray data.

| Gene                  | Accession no. | Primer sequence (5'-3')                                       | T <sub>m</sub> (°C) | Amplicon size (bp) | Reference |
|-----------------------|---------------|---------------------------------------------------------------|---------------------|--------------------|-----------|
| <i>RPL35A</i>         | NM_000996.2   | F: GGGTACAGCATCACTCGGA<br>R: ACGCCCGAGATGAAACAG               | 58                  | 220                | (15)      |
| <i>TSC2</i>           | X75621        | F: CCGTCTTCCACATCGCCACCCTG<br>R: ACGATCACGTGGACAAAAGTTGAACTG  | 67                  | 168                | (25)      |
| <i>ANO2</i>           | NM_020373.2   | F: AAGTGCGGCTCGATGCAAAGAAG<br>R: CGGAGGTGATCGCAATGACAAAAG     | 62                  | 152                | -         |
| <i>MAPK4</i>          | NM_002747     | F: TCTTCATCAGCACAGAGGACCTC<br>R: GGAGCAGTCGTGGGGAACGG         | 62                  | 138                | -         |
| <i>EREG</i>           | NM_001432     | F: ACAACTGTGATTCCATCATGTATCC<br>R: CTACACTTTGTTATTGACACTTGAGC | 62                  | 109                | -         |
| <i>UCA1</i>           | NR_015379.2   | F: GAGCTTCGGGTAACCTTTACGG<br>R: GATGGACGGCAGTTGGTGTGC         | 62                  | 153                | -         |
| <i>TSC2</i><br>(TAD1) | X75621        | F: TGTGCAGGAGAAGACGAACC<br>R: GGCACCGACAGTGACTTGTA            | 58                  | 240                | -         |
| <i>TSC2</i><br>(TAD2) | X75621        | F: GGTGTCCCTGCAGTGCAGGAAA<br>R: GAGCCGCTTGATGTGGCGGAG         | 56                  | 205                | -         |

Abbreviations: F, forward primer; R, reverse primer; T<sub>m</sub>, annealing temperature; and, bp, base pairs

**Supplementary Table S2.** Details of PCR primers used in the generation of different deletion constructs.

| Construct                       | Primer sequence (5' – 3')                                                                                  | T <sub>m</sub> (°C) | Amplicon size (bp) | Reference |
|---------------------------------|------------------------------------------------------------------------------------------------------------|---------------------|--------------------|-----------|
| pFP1EREG                        | F: TAGCCTCGAGCTCCATCAGCATAGGCAGGAA<br><i>XhoI</i><br>R: TAGCAGATCTCGGCGATGGGAGCGGGCGCT<br><i>BglII</i>     | 53                  | 1022               | (17)      |
| pFP2EREG                        | F: TAGCCTCGAGACAATGACTCGACTTTGAGG<br><i>XhoI</i><br>R: TAGCAGATCTCGGCGATGGGAGCGGGCGCT<br><i>BglII</i>      | 58                  | 733                | (17)      |
| pFP3EREG                        | F: TAGCCTCGAGCACTACTCTCAGGTGCTCCAG<br><i>XhoI</i><br>R: TAGCAGATCTCGGCGATGGGAGCGGGCGCT<br><i>BglII</i>     | 58                  | 328                | (17)      |
| pFP4EREG                        | F: TAGCAGATCTCTCCATCAGCATAGGCAGGAA<br><i>BglII</i><br>R: TAGCAAGCTTCTCAAAGTCGAGTCATTGTGA<br><i>HindIII</i> | 58                  | 309                | -         |
| pFP1EREG-<br>mut                | F: ACCACCCACTACAGGGCAGG<br>R: GTTCCCATACATGCCTTTGGA                                                        | 56                  | 966                | -         |
| pcDNA3.1(+)<br>/TSC2-<br>NLSdel | F: GAGGAAGCCGCCTACTCCAAC<br>R: GGCAATCCACTTGGAGGGGTAG                                                      | 58                  | 5385               | -         |

**Supplementary Table S3.** PCR primers used for the chromatin immunoprecipitation (ChIP) analysis.

| Primer | Pimer sequence (5' – 3')       | T <sub>m</sub> (°C) | Amplicon size (bp) | Reference |
|--------|--------------------------------|---------------------|--------------------|-----------|
| EREGF  | CTCCATCAGCATAGGCAGGAA          | 57                  | 554                | -         |
| EREGR  | GGTTGCTCAGGGTGACGGACATA        |                     |                    |           |
| EREGF1 | TATGTCCGTCACCCTGAGCAACC        | 57                  | 491                | -         |
| EREGR1 | CGGCGATGGGAGCGGGCGCT           |                     |                    |           |
| SP1F   | GGTACCGCTCCAAGGTTGCCTTCTCTATGA | 56                  | 601                | (19)      |
| SP1R   | CTCGAGGGCCAACCTCGGCCCTTCCTG    |                     |                    |           |

**Supplementary Table S4.** Sequences of the probes used in EMSA.

| Oligo          | Sequence(5' - 3')                                                                                           | Size (bp) | Probe *                          |
|----------------|-------------------------------------------------------------------------------------------------------------|-----------|----------------------------------|
| TS1F<br>TS1R   | CTCCATCAGCATAGGCAGGAAAGTGGGAGTGAGGAAAGCCTTAGAGTTTT<br>AAAACCTAAGCCTTTCCCTCACTCCCACCTTTCCTGCCTATGCTGATGGAG   | 50<br>50  | Probe 1 (-857 bp<br>to -807 bp)  |
| TS2F<br>TS2R   | CCAGCCTGGCTGGGGTCAGACAATTTGCCTGGGGAAATAGTGGGAGCTGA<br>TCAGCTCCCCTATTTCCTCCAGGCAAATTGTCTGACCCAGCCAGGCTGG     | 50<br>50  | Probe 2 (-807 bp<br>to -757 bp)  |
| TS3F<br>TS3R   | GGTTGAAAAGACCGATTGGCTTACGTTTGTGGCAGGCCTTGCCAAAAAG<br>CTTTTTGGACAAGGCCTGCCACAAACGTGAAGCCAATCGGTCTTTCAACC     | 51<br>51  | Probe 3 (-757bp<br>to -706 bp)   |
| TS4F<br>TS4R   | CAATAGGAAGTCGTTGAAAGGTTTTGTGCAGGGGAGCGACAGGATTAAGG<br>CCTTAATCCTGTCGCTCCCCTGCACAAAACCTTCAACGACTTCCTATTG     | 50<br>50  | Probe 4 (-706 bp<br>to -656 bp)  |
| TS5F<br>TS5R   | CACTACTTAGTAGGAAGTCATATCAAAAGCAGCAACCTGACAAATGGCAAA<br>TTTGCCATTTGTCAGGTTGCTGCTTTTGATATGACTTCCTACTAAGTAGTG  | 51<br>51  | Probe 5 (-656 bp<br>to -605 bp)  |
| TS6F<br>TS6R   | TACGACAGAAGGAAAAAATAACAGGAATTTTCTTCAATGACTCGACTT<br>AAGTCGAGTCATTGTGAAGAAAATTCCTGTTATTTTTTCTTCTGTCGTA       | 52<br>52  | Probe 6 (-605 bp<br>to -553 bp)  |
| TS7F<br>TS7R   | TGAGGTAATAAATGCCTGAGCCACATTGGAAGCAGGGGTCTCAGAAGGAA<br>TTCCTTCTGAGACCCCTGCTTCCAATGTGGCTCAGGCATTTATTACCTCA    | 50<br>50  | Probe 7 (-553 bp<br>to -503 bp)  |
| TS8F<br>TS8R   | GGCGCAGATGGGAAAGGCTTTTCTGGGCGGTGGCGTTTCAATGCAAGGAG<br>CTCCTTGCATTGAAACGCCACCGCCAGAAAAGCCTTCCCCTGTCGCC       | 50<br>50  | Probe 8 (-503 bp<br>to -453 bp)  |
| TS9F<br>TS9R   | GGCGCTTGAATCACTGACAGACTTCAAGTTAAGGGAGTTTTCGTGGCTGAG<br>CTCAGCCACGAAAACCTCCCTTAACCTGAAGTCTGTCAGTGATTCAAGCGCC | 51<br>51  | Probe 9 (-453 bp<br>to -402 bp)  |
| TS10F<br>TS10R | GTTAGTAAGTCACACGCACAGCTCTCCAAGGCATGTATGGGGAACGCCA<br>TGCGGTTCCCATACATGCCTTTGGAGAGCTGTGCGTGTGACTTACTAAC      | 50<br>50  | Probe 10 (-402 bp<br>to -352 bp) |
| TS11F<br>TS11R | GCCTTGGCTAAAAGACTGATTCAAGTTATGTCCGTCACCCCTGAGCAACC<br>GGTTGCTCAGGGTGACGGACATAACTTAATCAGTCTTTTAGCCAAGGC      | 49<br>49  | Probe 11 (-352 bp<br>to -303 bp) |

\* A double-stranded probe was made by mixing equal amount of each of the two oligos.  
Abbreviation: bp, base pairs.
